# Supplementary material
Source: publisher figshare collection journal article supplement (https://gsajournals.figshare.com/ndownloader/files/15459581)
Supplement: Supplementary file 1 [file 15459581]

**Supplementary Table S4**. Genetic diversity in Sabah weedy rice samples grouped by sampling location. Abbreviations of genetic diversity parameters are as follows: *P*, percentage of polymorphic loci; *H*o, observed heterozygosity; *H*e, expected heterozygosity; *I*, Shannon diversity index.

| **District** | **Population** | **Na** | ***P* (%)** | ***H*o** | ***H*e** | **MA** | ***I*** |
| --- | --- | --- | --- | --- | --- | --- | --- |
| **Kota Belud** | **KS** | 7 | 91.67 | 0.078 | 0.505 | 2 | 0.859 |
| **TS** | 6 | 87.50 | 0.049 | 0.465 | 2 | 0.782 |
|  | **TW** | 11 | 79.17 | 0.068 | 0.320 | 1 | 0.560 |
|  | **TA** | 15 | 91.67 | 0.024 | 0.447 | 0 | 0.833 |
|  | **TG** | 6 | 79.17 | 0.017 | 0.476 | 15 | 0.800 |
| **Kota Marudu** | **MK** | 11 | 87.50 | 0.054 | 0.460 | 7 | 0.827 |
| **MS** | 17 | 87.50 | 0.032 | 0.433 | 6 | 0.796 |
|  | **NT** | 19 | 91.67 | 0.020 | 0.497 | 4 | 0.936 |
|  | **LB** | 13 | 87.50 | 0.058 | 0.487 | 5 | 0.916 |
|  | **BG** | 23 | 91.67 | 0.029 | 0.486 | 5 | 0.920 |
|  | **TT** | 10 | 91.67 | 0.015 | 0.460 | 4 | 0.837 |
| All weedy rice: | | 138 | 87.90 | 0.040 | 0.458 | 51 | 0.824 |

Abbreviations: *N*, number of entries; KS, Kampung Sangkir; TS, Taun Usik; TW, Tawadakan; TA, Tamau; TG, Kampung Timbang; MK, Mangkalua; MS, Kampung Masolong; NT, Nolotan; LB, Longob; BG, Kampung Balagaton; TT, Telangtang.
